# Supplementary material for: Highly efficient and stable tandem luminescent solar concentrators based on carbon dots and CuInSe2−xSx/ZnS quantum dots
Source: Royal Society of Chemistry journal article supplement (doi:10.1039/d3nr05471c), 2023-11-17
Supplement: d3nr05471c1.pdf [file d3nr05471c1.pdf]

## Supplementary information

### **Highly efficient and stable tandem luminescent solar concentrators based on carbon dots and CuInSe<sub>2-x</sub>S<sub>x</sub>/ZnS quantum dots**

Lianju Wang,<sup>a</sup> Yiqing Chen,<sup>a</sup> Yueling Lai,<sup>a</sup> Xianglong Zhao,<sup>a</sup> Kanghui Zheng,<sup>a</sup> Ruilin Wang<sup>a,b</sup> and Yufeng Zhou<sup>\*a</sup>

<sup>a</sup> College of Materials Science and Engineering, Sichuan University, Chengdu 610065, P. R. China. \* Email: yfzhou@scu.edu.cn

<sup>b</sup> Engineering Research Center of Alternative Energy Materials & Devices, Ministry of Education, Chengdu 610065, P. R. China.

## Experimental and Methods

**Materials.** Trans-aconitic acid (TAA, 98%), diethylenetriamine (DETA, 97%), indium acetate  $\{\text{In}(\text{Ac})_3, 99.99\%\}$ , 1-dodecanethiol (DDT, 98%), oleylamine (OLA, 80 ~ 90%), oleic acid (OA, 99.7%), 1-octadecene (ODE, >90.0%), Zn stearate (reagent grade), lauryl methacrylate (LMA, 96%) and Ethylene glycol dimethacrylate (EGDM, 97%) and Diphenyl (2,4,6-trimethylbenzoyl) phosphine oxide (IRGACURE 651, 97%) were purchased from Aladdin Reagent Co., Ltd, China. Sulfuric acid ( $\text{H}_2\text{SO}_4$ , 99.7%), copper iodide (CuI, 99.7%), methanol ( $\text{CH}_3\text{OH}$ , 99.7%) and polyvinylpyrrolidone K30 (PVP, 99.7%) were purchased from Chengdu Kelong Chemical Co., Ltd, China.

**Synthesis of carbon dots.** First, dissolve 0.52 g of trans-aconitic acid (TAA) and 2695  $\mu\text{l}$  of diethylenetriamine (DETA) in 15 ml of distilled water (DW), and stir the solution well. Then, adjust the pH to 5 with 1 mol/L sulfuric acid. The solution was transferred to a Teflon-lined stain less steel autoclave, and a dark yellow solution was obtained after heating in an oven at 200 °C for 4 h. The dark yellow solution was dialyzed against distilled water for 12 h using a dialysis bag (MWCO = 1000 Da), and the solution in the dialysis bag was collected.

**Synthesis of  $\text{CuInSe}_{2-x}\text{S}_x$  quantum dots.** Preparation of Se precursor: Dissolve 1 mmol Se powder in 0.75 mL OLA and 0.25 mL DDT solution in a 25 ml three-neck flask at room temperature under  $\text{N}_2$  atmosphere. Core QDs preparation process: First, 1 mmol of cuprous iodide (CuI), 1 mmol of indium acetate  $\{\text{In}(\text{Ac})_3\}$ , 5 mL of 1-dodecanethiol (DDT), and 1 mL of oleylamine (OLA) were added to a 50 mL three-neck flask. The flask was then heated to 90 °C and evacuated for 30 min (repeated three times), and then the temperature was raised to 140 °C and maintained for 25 min to wait for the complete dissolution of the precursors. The three-necked flask was heated to 180 °C and the prepared Se source was added dropwise. The temperature control was maintained for 10 min for quantum dot nucleation. The three-necked flask was then quickly heated to 235 °C and held for 40 min before the reaction was quenched and stopped with cold water. Finally, the prepared solution was stored in a 3 °C refrigerator.

**Synthesis of  $\text{CuInSe}_{2-x}\text{S}_x/\text{ZnS}$  quantum dots.** Preparation of ZnS precursors: 6.32

g of zinc stearate with 20 ml ODE, 10ml OA and 10 ml DDT was added to a 100 ml three-necked flask and degassed under vacuum at 90 °C for 30 min, and nitrogen was passed through the flask for 30 min (repeated 3 times). Then the temperature was elevated to 150 °C and kept for 10 min, and finally the temperature was kept at 50 °C for reserve. Core-shell QDs preparation process: First, the prepared  $\text{CuInSe}_{2-x}\text{S}_x$  quantum dots were heated to 235 °C in a 100 ml three-necked flask, and then the prepared ZnS precursor was added into the three-necked flask in four additions, each at an interval of 2 h (each addition of ~ 11 ml, the temperature was kept at 235 °C). After the last addition of the ZnS precursor was kept at 235 °C for 4 h. At the end of the reaction, the temperature was quickly brought down to room temperature with cold water and then stored in a 3 °C refrigerator.

**Fabrication of LSCs based on CDs.** The CDs dispersed in methanol (4 mg/ml) were mixed well with a certain amount of PVP (PVP concentration of 200 mg/mL), and then the mixture was dropped onto a glass substrate for spin-coating (spin-coating parameter: 100 r.p.m./s at low speed, 300 r.p.m./s at high speed, and the size of the glass was  $10 \times 10 \times 2 \text{ cm}^3$ ).

**Fabrication of LSCs based on  $\text{CuInSe}_{2-x}\text{S}_x/\text{ZnS}$  QDs.** Firstly, lauryl methacrylate (LMA) and ethylene glycol dimethacrylate (EGDM) were mixed in a 4:1 mass. The solution is mixed with diphenyl (2,4,6-trimethylbenzoyl) phosphine oxide (mass fraction:1 wt%) and sonicated until a clear solution is obtained. Then, the solution was then injected into a flask containing dry QDs, and the mixture was homogeneously dispersed by sonication. The mixture was injected into a mould consisting of two glass plates separated by a flexible rubber spacer of  $\approx 3$  mm thickness. Finally, the mixtures were irradiated under a UV lamp (wavelength of 395 nm) for 5 min and darkened for 30 min.

**Characterizations.** Absorption spectra of the CDs and  $\text{CuInSe}_{2-x}\text{S}_x/\text{ZnS}$  QDs were acquired with a visible, near-infrared spectrophotometer (UV-3600i, Shimadzu Corp, Japan). The PL spectra of CDs and  $\text{CuInSe}_{2-x}\text{S}_x/\text{ZnS}$  QDs were measured with a time-resolved fluorescence spectrometer (FL3-22, Jobin-Yvon, USA). The FT-IR spectra of

CDs were recorded by an FT-IR spectrometer (Nicolet 6700, Thermo Electron, USA). Chemical elemental analysis of CDs and CuInSe<sub>2-x</sub>S<sub>x</sub>/ZnS QDs was performed by X-ray photoelectron spectroscopy (XPS) AXIS Supra (Kratos, UK). The XRD detection of CDs and CuInSe<sub>2-x</sub>S<sub>x</sub>/ZnS QDs was performed using X-ray diffraction (Empyrean, Panalytical, Netherlands). The size and morphology of CDs and CuInSe<sub>2-x</sub>S<sub>x</sub>/ZnS QDs were characterized by TEM (Tecnai G2-F20-S-TWIN, Ectronoptics, Netherlands). The optoelectronic performance characterization of LSCs was obtained by a solar simulator (SS-X100R, Enlitech, China) at an intensity of AM 1.5G (100 mW/cm<sup>2</sup>) and calibrated with a calibrated silicon solar cell.

## Results

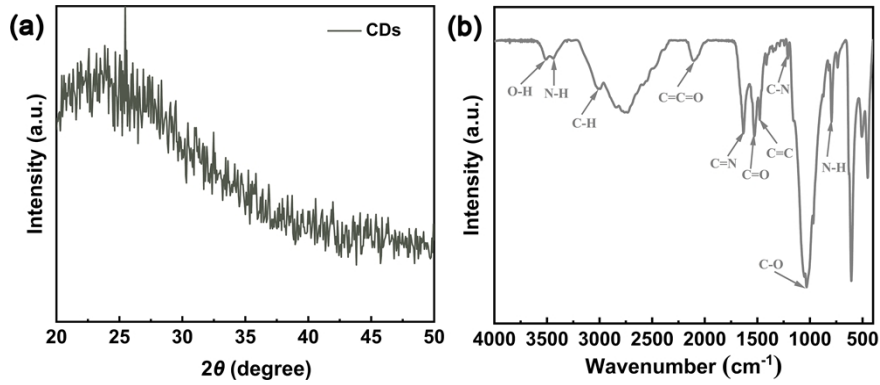

**Fig. S1** (a) XRD and (b) FTIR patterns of CDs.

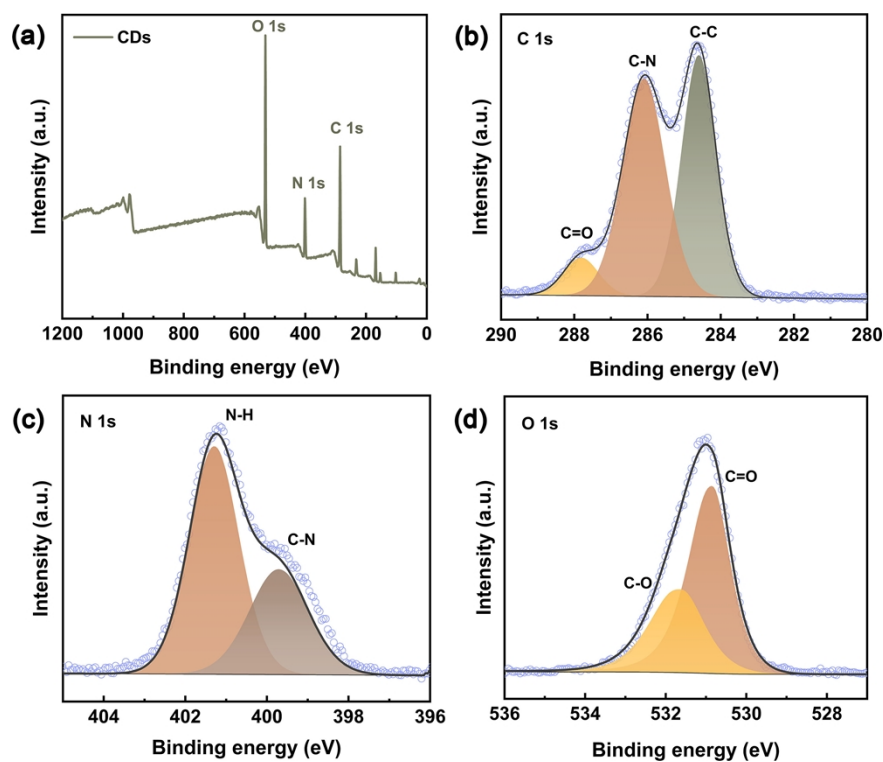

**Fig. S2** (a) XPS analysis of the CDs. High-resolution XPS spectra of the C 1s (b), N 1s (c), O 1s (d).

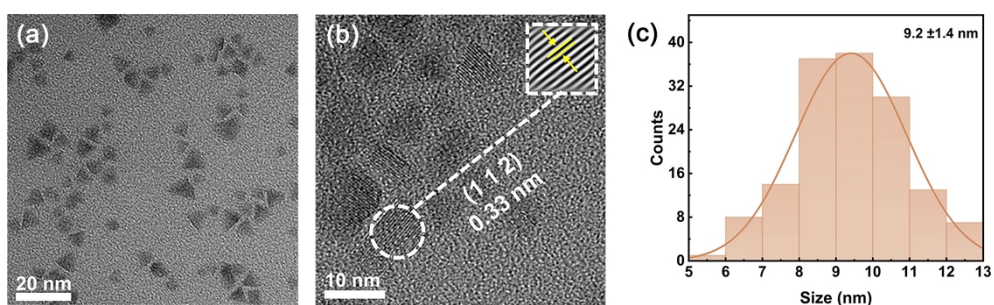

**Fig. S3** Typical TEM and HRTEM images of CuInSeS QDs (a, b). (c) Size distributions of CuInSeS QDs.

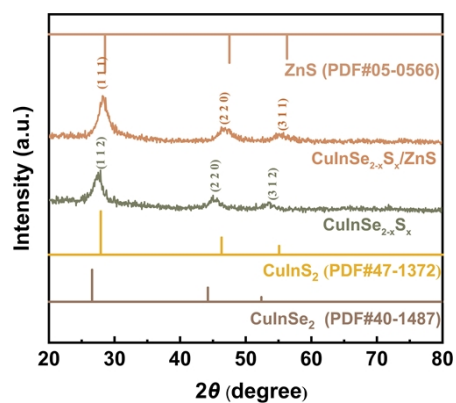

**Fig. S4** XRD patterns of CuInSeS QDs and CuInSeS/ZnS QDs.

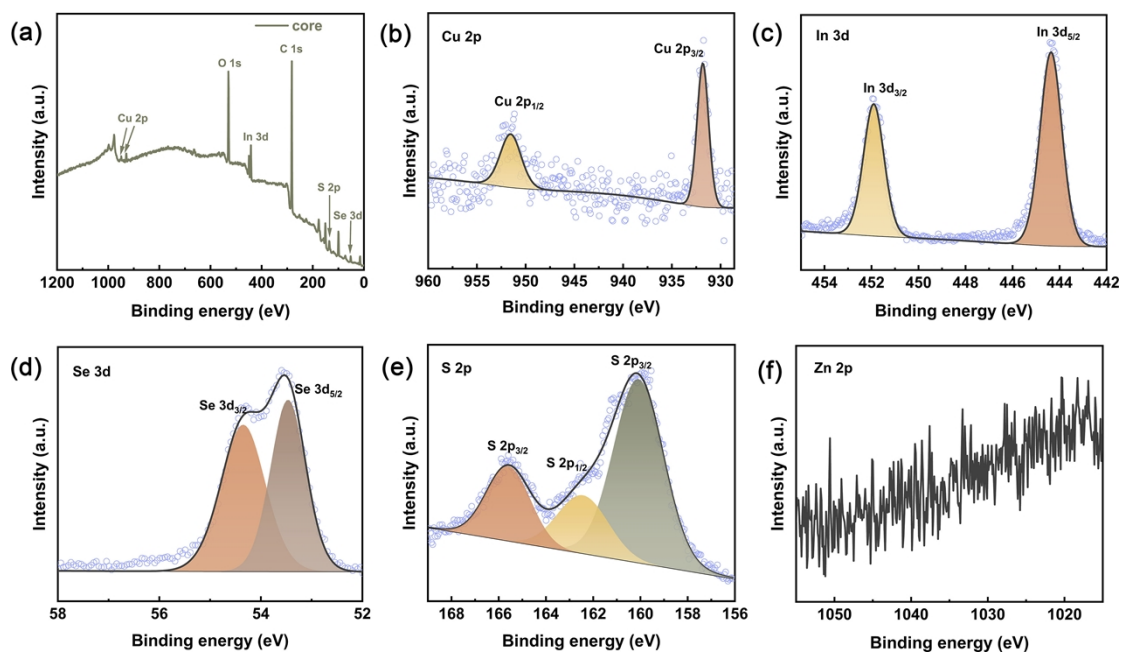

**Fig. S5** (a) XPS survey spectra of CuInSeS QDs. High-resolution spectra of Cu 2p (b), In 3d (c), Se 3d (d), S 2p (e) and Zn 2p (f).

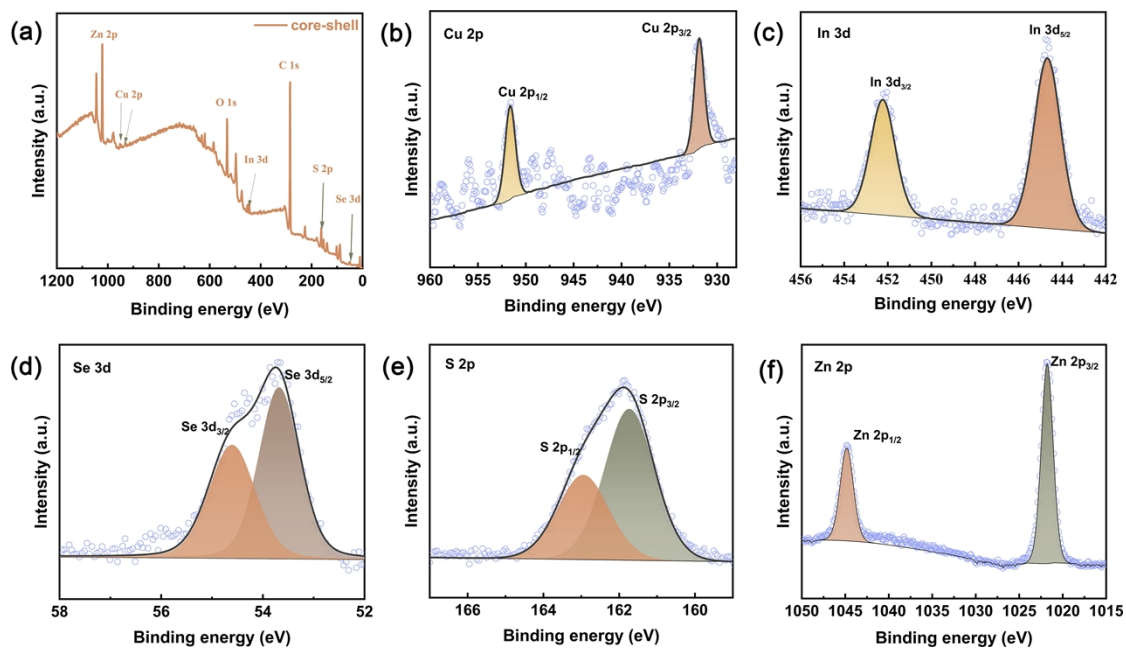

**Fig. S6** (a) XPS survey spectra of CuInSeS/ZnS QDs. High-resolution spectra of Cu 2p (b), In 3d (c), Se 3d (d), S 2p (e) and Zn 2p (f).

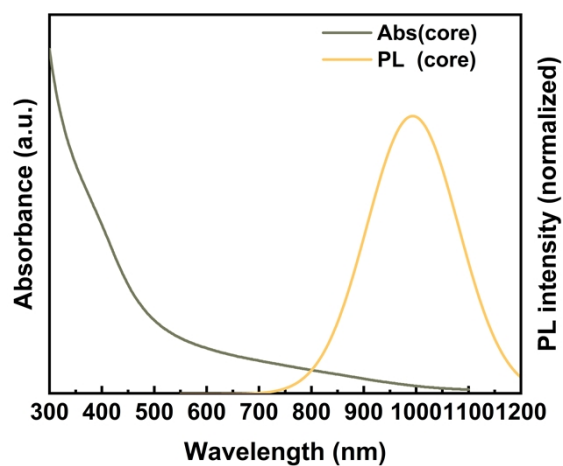

**Fig. S7** Normalized absorption curves and PL spectrum of CuInSeS QDs in hexane.

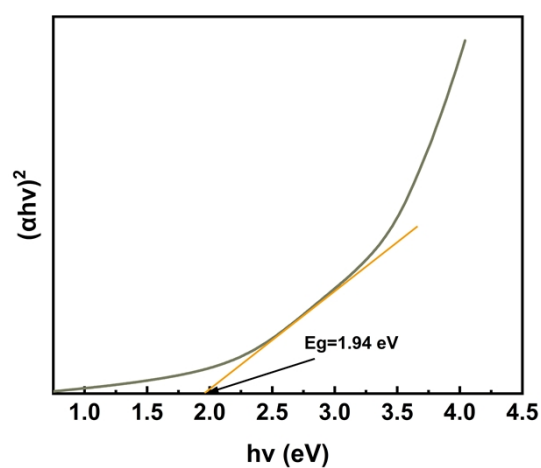

**Fig. S8** Tauc plot of CuInSeS/ZnS QDs.

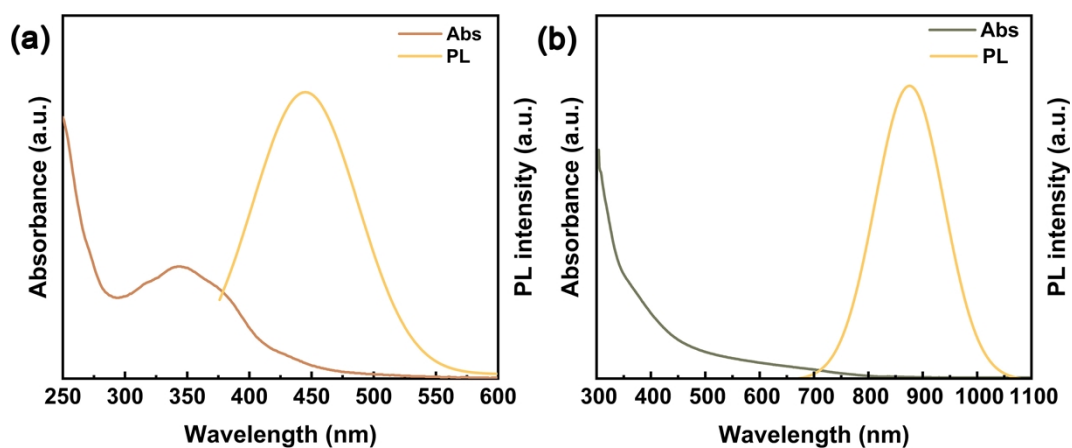

**Fig. S9** Absorption and PL spectra of CDs in polymer (a) and CuInSeS/ZnS QDs in polymer (b).

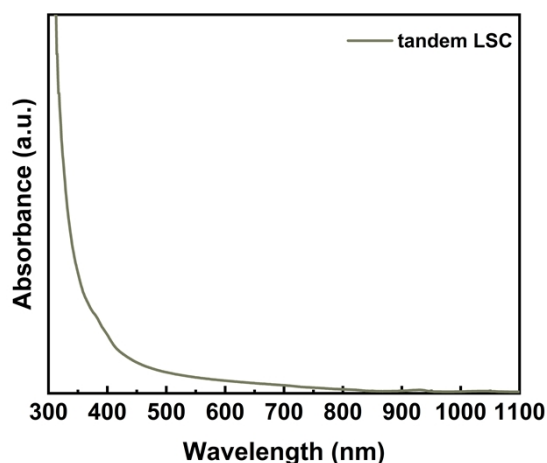

**Fig. S10** Absorption spectrum of tandem LSCs based on CDs and CuInSeS/ZnS QDs.

### Time Resolved Spectroscopic Characterization

To explore the lifetime of QDs dispersed in liquids and solids, we performed time-correlated single photon counting (TCSPC) measurements. The lifetime decay of QDs dispersed in the solid and liquid are complex bi-exponential decay trend. The fitting equation is as follows:

$$I(t) = A_1 e^{-\frac{t}{\tau_1}} + A_2 e^{-\frac{t}{\tau_2}}$$

Where  $A_1$  and  $A_2$  are the coefficients of the fitting of PL decay,  $\tau_1$  and  $\tau_2$  are the related time constants. From these values, the average decay lifetime was calculated as follows:

$$\tau_{\text{AVG}} = \frac{A_1 \tau_1^2 + A_2 \tau_2^2}{A_1 \tau_1 + A_2 \tau_2}$$

**Table S1** PL lifetimes of CuInSeS/ZnS QDs in hexane and polymer, and CDs in methanol and polymer.

| Samples            | phase  | $A_1$<br>(%) | $\tau_1$ (ns) | $A_2$<br>(%) | $\tau_2$ (ns) | $\tau_{\text{AVG}}$<br>(ns) |
|--------------------|--------|--------------|---------------|--------------|---------------|-----------------------------|
| CuInSeS/ZnS<br>QDs | liquid | 37           | 263.54        | 63           | 925.79        | 831                         |
|                    | solid  | 38           | 114.22        | 62           | 559.23        | 510                         |
| CDs                | liquid | 88           | 9.55          | 12           | 22.7          | 12.8                        |
|                    | solid  | 56           | 1.94          | 44           | 8.68          | 7.2                         |



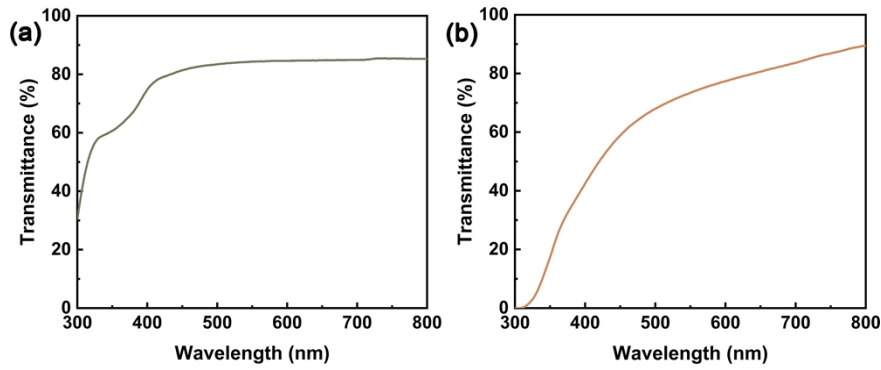

**Fig. S11** Transmittances of LSCs based on CDs (a) and CuInSeS/ZnS QDs (b).

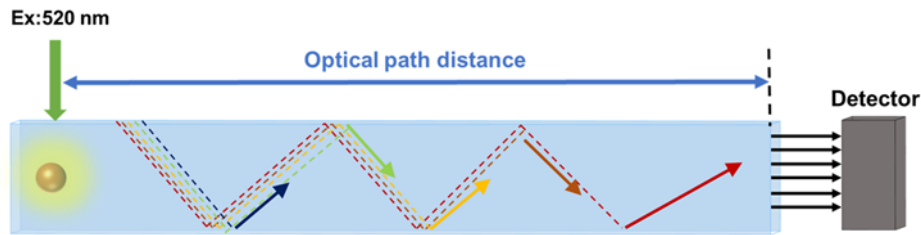

**Fig. S12** Schematic diagram for measuring PL spectra as a function of excitation distance.

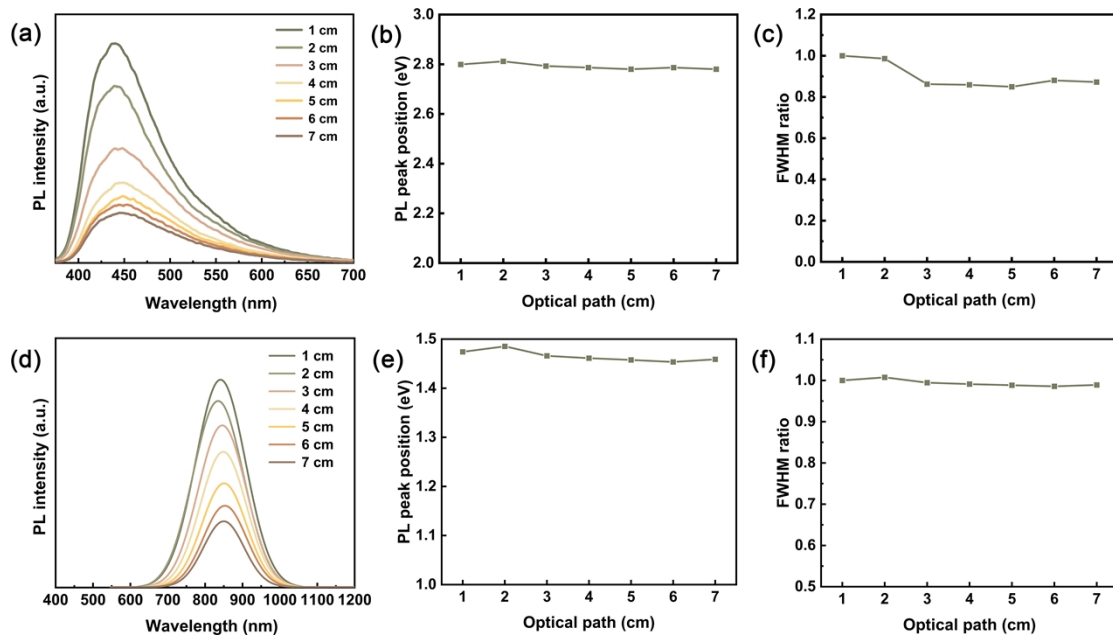

**Fig. S13** PL attenuation spectra measured at different optical paths (L) for the CDs based LSCs (a) and the CuInSeS/ZnS QDs based LSCs (d). PL peak position of the CDs based LSCs (b) and the CuInSeS/ZnS QDs based LSCs (e) as a function of optical path. PL full width at half maximum (FWHM) ratio of the CDs based LSCs (c) and the CuInSeS/ZnS QDs based LSCs (f) as a function of optical path.

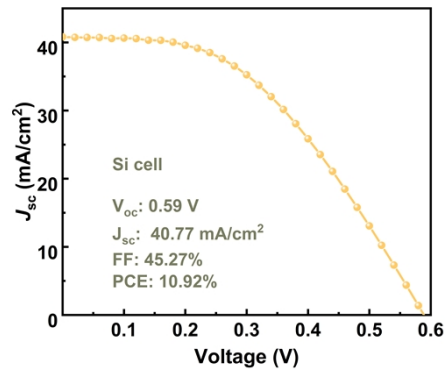

**Fig. S14** J-V curve of a silicon solar cell under one sun illumination.

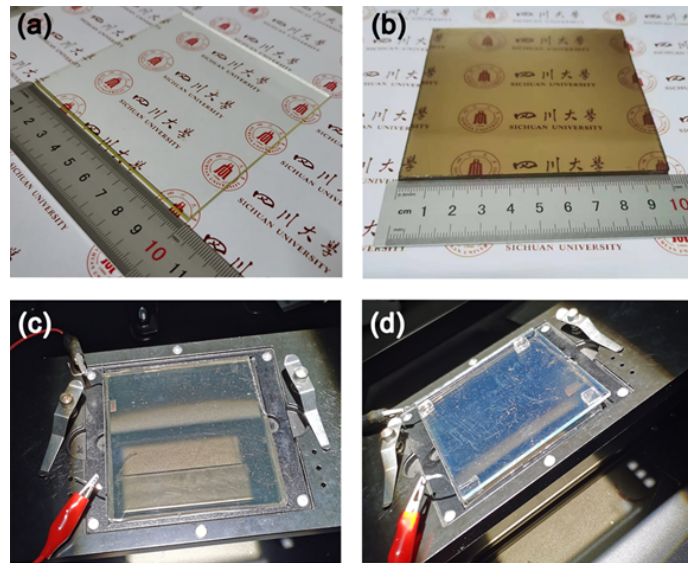

**Fig. S15** Photographs of LSCs based on CDs (a) and CuInSeS/ZnS QDs (b). Photographs of experimental setup for measuring opto-electronic performance of single LSCs (c) and tandem LSCs (d).

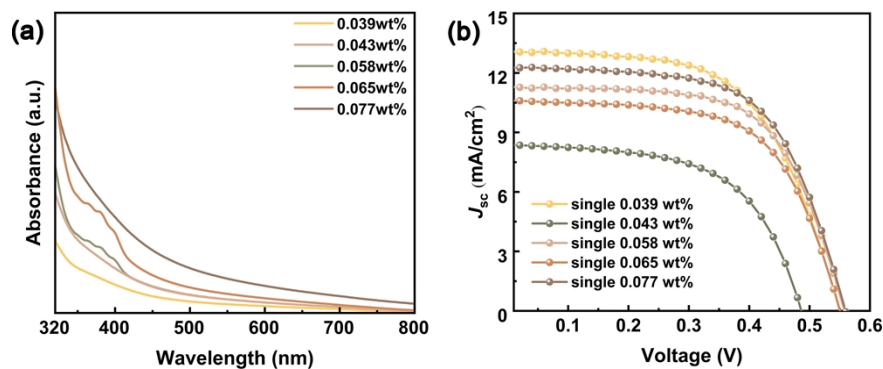

**Fig. S16** (a) Absorption spectra of LSCs based on CuInSeS/ZnS QDs at different concentrations. (b) J-V curves of LSCs based on CuInSeS/ZnS QDs at different concentrations.

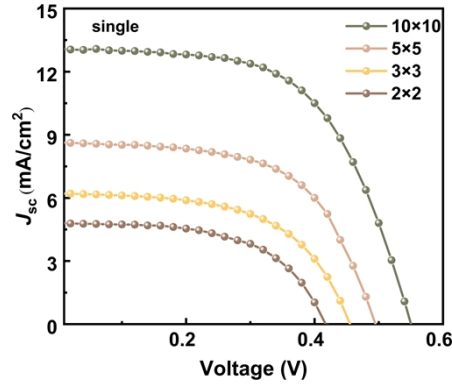

**Fig. S17** J-V curves of the single LSC-PV system with different lateral areas.

**Table S2** Power conversion efficiency, external optical efficiencies, internal optical efficiencies and absorptance for the single LSCs based on different types of fluorophores.

| Types of QDs                                    | PL peak position (nm) | PL QY (%) | Stokes Shift (meV) | LSC size (L × W × H) cm × cm × cm | PCE (%) | $\eta_{\text{ext}}$ (%) | $\eta_{\text{int}}$ (%) | $\eta_{\text{abs}}$ (%) | Refs.     |
|-------------------------------------------------|-----------------------|-----------|--------------------|-----------------------------------|---------|-------------------------|-------------------------|-------------------------|-----------|
| CuInSe <sub>2-x</sub> S <sub>x</sub> /ZnS       | 878                   | 61        | 530                | 10 × 10 × 0.3                     | 0.50    | 2.87                    | 36.37                   | 8                       | This work |
|                                                 |                       |           |                    | 5 × 5 × 0.3                       | 0.60    | 3.39                    | 42.93                   |                         |           |
|                                                 |                       |           |                    | 3 × 3 × 0.3                       | 0.64    | 3.62                    | 45.88                   |                         |           |
|                                                 |                       |           |                    | 2 × 2 × 0.3                       | 0.68    | 3.86                    | 48.80                   |                         |           |
| CuInS <sub>2</sub> /ZnS                         | 862                   | 91        | >550               | 10 × 10                           | 2.18    | -                       | -                       | 35.5                    | 1         |
| Yb <sup>3+</sup> -doped CsPbCl <sub>3</sub> NCs | 990                   | 164       | 1847               | 5 × 5 × 0.2                       | -       | 3.70                    | 120                     | 3.1                     | 2         |
| CuInSe <sub>2</sub> /ZnS                        | 805                   | 70        | 160                | 12 × 12 × 0.16                    | -       | 5.10                    | 18.2                    | 28                      | 3         |

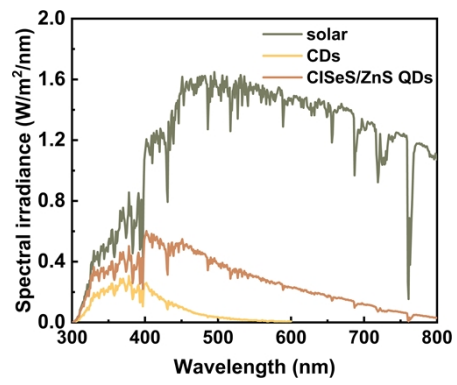

**Fig. S18** Calculated absorption of the LSCs and solar spectrum (AM 1.5G, 100 mW/cm<sup>2</sup>).

## References

1. M. R. Bergren, N. S. Makarov, K. Ramasamy, A. Jackson, R. Guglielmetti and H. McDaniel, *ACS Energy Letters*, 2018, 3, 520-525.
2. X. Luo, T. Ding, X. Liu, Y. Liu and K. Wu, *Nano Letters*, 2019, 19, 338-341.
3. K. Wu, H. Li and V. I. Klimov, *Nature Photonics*, 2018, 12, 105-110.
